# Supplementary material for: Octahedral Pt-Pd alloy catalysts with enhanced oxygen reduction activity and stability in proton exchange membrane fuel cells
Source: Royal Society of Chemistry journal article supplement (doi:10.1039/c1ra00308a), 2011-12-12
Supplement: c1ra00308a.pdf [file c1ra00308a.pdf]

## Supporting Information

# Octahedral Pt-Pd Alloy Catalysts with Enhanced Oxygen Reduction Activity and Stability in Proton Exchange Membrane Fuel Cells

Young-Woo Lee, A-Ra Ko, Do-Young Kim, Sang-Beom Han, and Kyung-Won Park\*

Department of Chemical Engineering, Soongsil University,

Seoul 156743, Republic of Korea

\* CORRESPONDING AUTHOR

E-mail address: kwpark@ssu.ac.kr.

Tel: 82-2-820-0613. Fax: 82-2-812-5378.

**Additional Data**

***Figure S1: TEM images of as-synthesized octahedral Pt-Pd alloy NPs***

***Figure S2: Particle size histograms of as-prepared NPs***

***Figure S3: CVs of as-prepared catalysts***

***Figure S4: ORR polarization curves of as-prepared catalysts***

***Figure S5: TEM images of S-Pt<sub>3</sub>Pd<sub>1</sub>/C***

***Figure S6 ORR polarization curves of S-Pt<sub>3</sub>Pd<sub>1</sub>/C***

***Figure S7 TEM images of Octa-Pt<sub>3</sub>Pd<sub>1</sub>/C before and after durability test***

***Figure S8 TEM images of S-Pt<sub>3</sub>Pd<sub>1</sub>/C before and after durability test***

***Figure S9: TEM images of Pt/C before and after durability test***

---

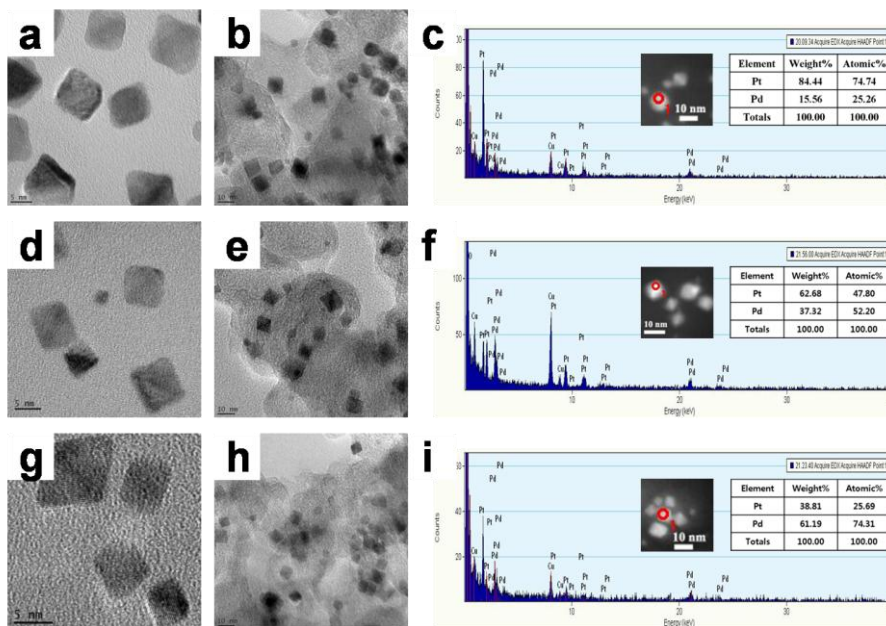

**Figure S1.** TEM images of octahedral Pt<sub>3</sub>Pd<sub>1</sub> (a); Pt<sub>1</sub>Pd<sub>1</sub> (d); and Pt<sub>1</sub>Pd<sub>3</sub> (g) NPs. TEM images of as-prepared Pt-Pd deposited on carbon black (Vulcan XC-72R): Pt<sub>3</sub>Pd<sub>1</sub>/C (b), Pt<sub>1</sub>Pd<sub>1</sub>/C (e), and Pt<sub>1</sub>Pd<sub>3</sub>/C (h). EDX spectra of as-synthesized Pt-Pd alloy NPs: Pt<sub>3</sub>Pd<sub>1</sub> (c), Pt<sub>1</sub>Pd<sub>1</sub> (f), and Pt<sub>1</sub>Pd<sub>3</sub> (i).

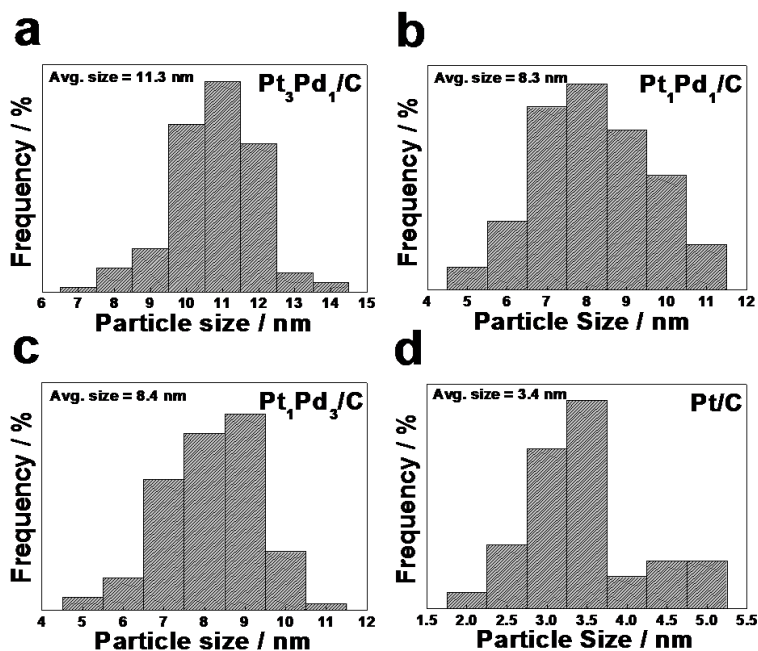

**Figure S2.** Particle size histograms of Pt<sub>3</sub>Pd<sub>1</sub>/C (a), Pt<sub>1</sub>Pd<sub>1</sub>/C (b), Pt<sub>1</sub>Pd<sub>3</sub>/C (c), and Pt/C (d).

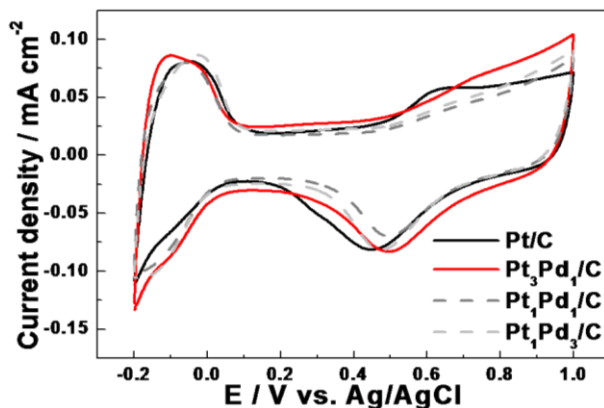

**Figure S3.** CVs of octahedral Pt-Pd alloy catalysts and Pt/C in Ar-saturated 0.1 M HClO<sub>4</sub> with a scan rate of 50 mV s<sup>-1</sup> at 25 °C.

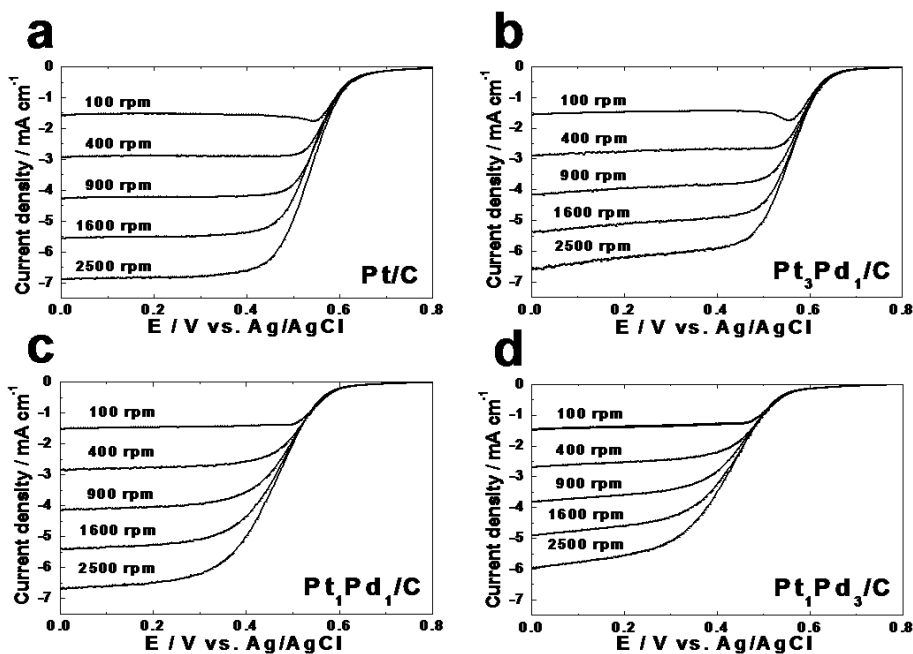

**Figure S4.** ORR polarization curves of Pt/C (a), Pt<sub>3</sub>Pd<sub>1</sub>/C (b), Pt<sub>1</sub>Pd<sub>1</sub>/C (c), and Pt<sub>1</sub>Pd<sub>3</sub>/C (d) in O<sub>2</sub>-saturated 0.1 M HClO<sub>4</sub> solution by sweeping the potential from 0.8 to 0 V with a scan rate of 5 mV s<sup>-1</sup>.

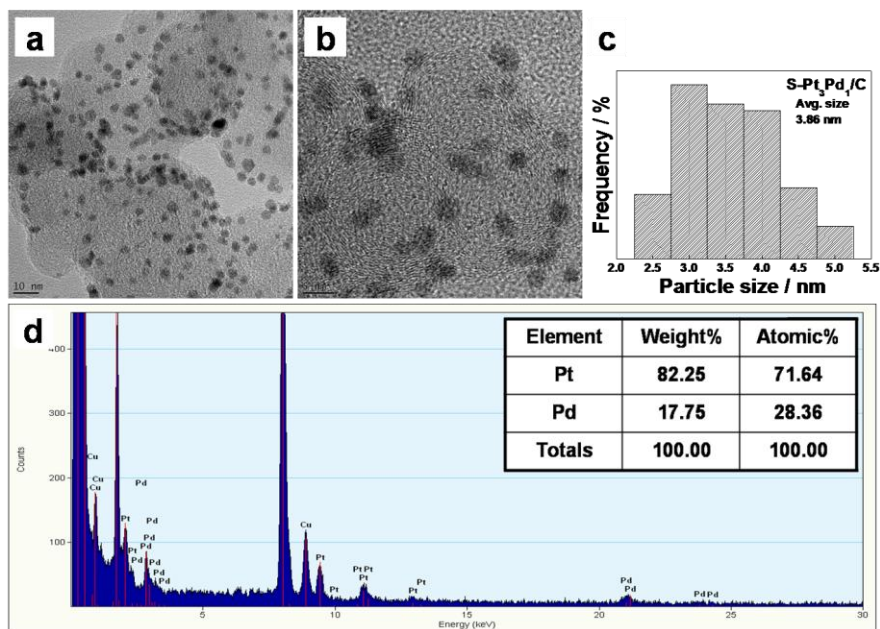

**Figure S5.** (a) and (b) TEM images of the spherical  $\text{Pt}_3\text{Pd}_1$  NPs deposited on Vulcan XC-72R (S- $\text{Pt}_3\text{Pd}_1/\text{C}$ ). (c) Size distribution and (d) EDX spectra of spherical  $\text{Pt}_3\text{Pd}_1$  alloy NPs.

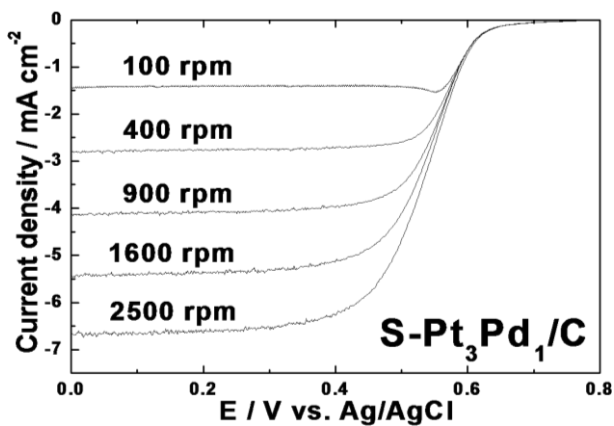

**Figure S6.** ORR polarization curves of S- $\text{Pt}_3\text{Pd}_1/\text{C}$  in  $\text{O}_2$ -saturated 0.1 M  $\text{HClO}_4$  solution by sweeping the potential from 0.8 to 0 V with a scan rate of  $5 \text{ mV s}^{-1}$ .

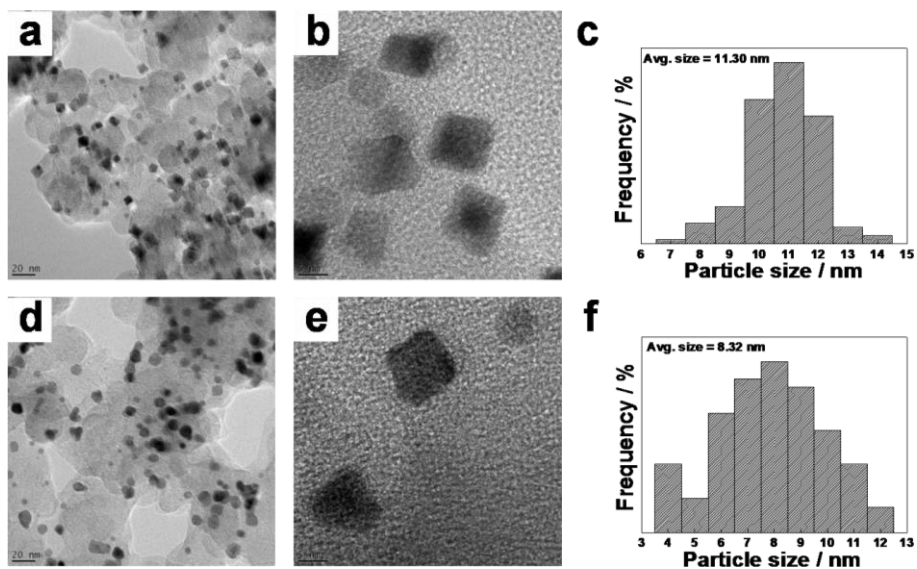

**Figure S7.** TEM images and particle size histograms of Octa-Pt<sub>3</sub>Pd<sub>1</sub>/C before (a-c) and after (d-f) durability test.

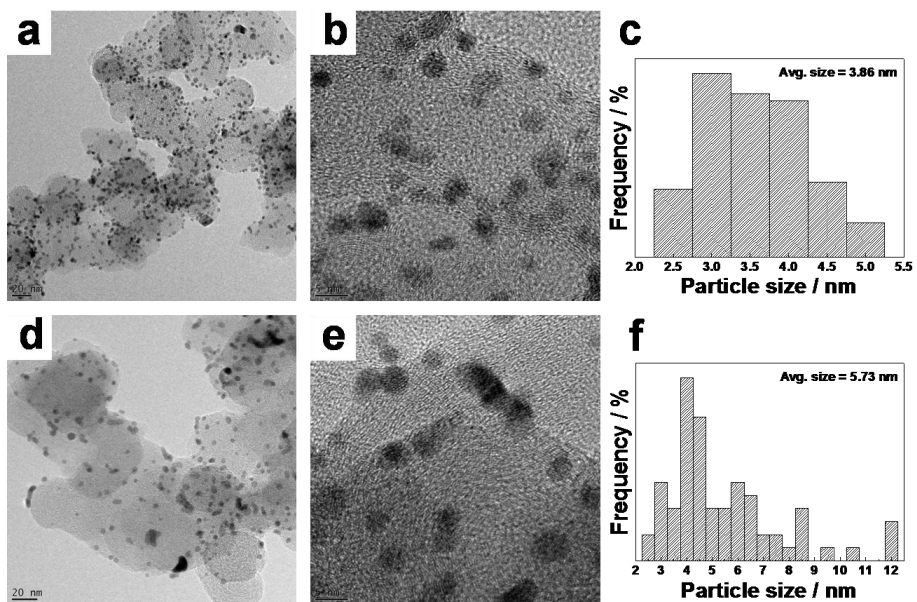

**Figure S8.** TEM images and particle size histograms of S-Pt<sub>3</sub>Pd<sub>1</sub>/C before (a-c) and after (d-f) durability test.

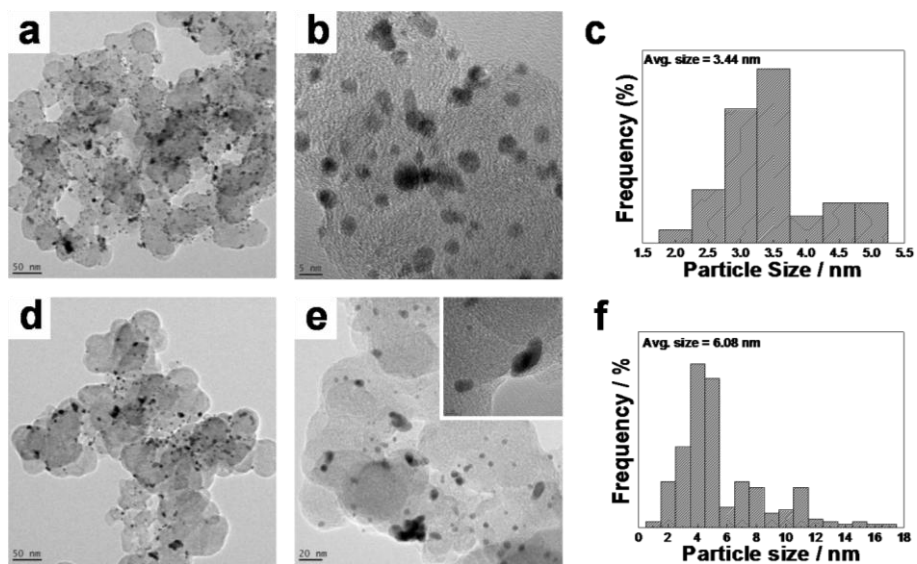

**Figure S9.** TEM images and particle size histograms of Pt/C before (a-c) and after (d-f) durability test.
